# Supplementary material for: Differential expression of exosomal miRNAs between breast cancer patients with and without recurrence
Source: PubMed Central journal article supplement (PMC5642528; doi:10.18632/oncotarget.19482), 2017-07-22
Supplement: oncotarget-08-69934-s001.pdf [file oncotarget-08-69934-s001.pdf]

## Differential expression of exosomal miRNAs between breast cancer patients with and without recurrence

### SUPPLEMENTARY MATERIALS

Supplementary Table 1: Patients' characteristics for tissue miRNA analyses

|                                   | Patients without recurrence<br>(n = 39) | Patients with recurrence (n = 35) | <i>P</i> |
|-----------------------------------|-----------------------------------------|-----------------------------------|----------|
| Mean age at diagnosis (min, max)  | 61 (30–81)                              | 57 (30–91)                        | 0.171    |
| Menopausal status                 |                                         |                                   |          |
| Premenopausal                     | 11 (28%)                                | 12 (34%)                          |          |
| Postmenopausal                    | 28 (72%)                                | 23 (66%)                          | 0.573    |
| Tumor size (cm)                   |                                         |                                   |          |
| Median ± SD                       | 1.8 ± 1.02                              | 3.0 ± 2.55                        | <0.01    |
| Nodal status                      |                                         |                                   |          |
| Negative                          | 23 (59%)                                | 16 (46%)                          |          |
| Positive                          | 16 (41%)                                | 19 (54%)                          | 0.254    |
| Stage                             |                                         |                                   |          |
| 1                                 | 15 (38%)                                | 8 (23%)                           |          |
| 2                                 | 22 (56%)                                | 18 (51%)                          |          |
| 3                                 | 2 (5%)                                  | 9 (26%)                           | 0.034    |
| Nuclear grade                     |                                         |                                   |          |
| 1,2                               | 28 (72%)                                | 23 (66%)                          |          |
| 3                                 | 11 (28%)                                | 12 (34%)                          | 0.573    |
| Ki67 labeling index, Median ± SD  | 33 ± 22.1                               | 33 ± 26.5                         | 0.691    |
| Tumor subtype                     |                                         |                                   |          |
| Luminal (ER and/or PR+ and HER2-) | 29 (74%)                                | 22 (63%)                          |          |
| HER2 (ER and/or PR+/- and HER2+)  | 7 (18%)                                 | 5 (14%)                           |          |
| TN (ER and PR and HER2-)          | 3 (8%)                                  | 8 (23%)                           | 0.206    |
| Adjuvant treatment                |                                         |                                   |          |
| Endocrine therapy                 | 30 (77%)                                | 20 (57%)                          |          |
| Chemotherapy                      | 9 (23%)                                 | 19 (54%)                          |          |
| Trastuzumab                       | 4 (10%)                                 | 2 (6%)                            |          |

ER, estrogen receptor; PR, progesterone receptor; HER2, human epidermal growth factor 2.

**Supplementary Table 2: Correlation between miRNA expression in exosomes and tissues**

| <b>miRNA</b>    | <b>Spearman's correlation coefficient</b> | <b><i>P</i></b> |
|-----------------|-------------------------------------------|-----------------|
| has-miR-338-3p  | -0.075                                    | 0.76            |
| has-miR-340-5p  | -0.233                                    | 0.34            |
| has-miR-124-3p  | -0.153                                    | 0.51            |
| has-miR-29b-3p  | -0.045                                    | 0.85            |
| has-miR-20b-5p  | -0.128                                    | 0.61            |
| has-miR-17-5p   | -0.166                                    | 0.48            |
| has-miR-130a-3p | -0.396                                    | 0.084           |
| has-miR-18a-5p  | -0.298                                    | 0.23            |
| has-miR-195-5p  | -0.336                                    | 0.14            |
| has-miR-486-5p  | -0.126                                    | 0.6             |
| has-miR-93-5p   | -0.434                                    | 0.063           |

**A**

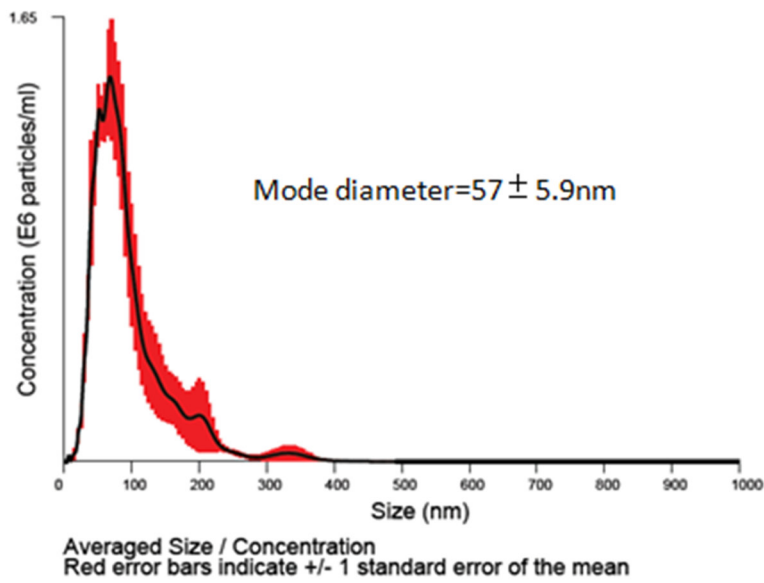

**B**

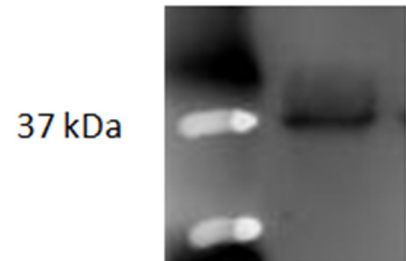

**C**

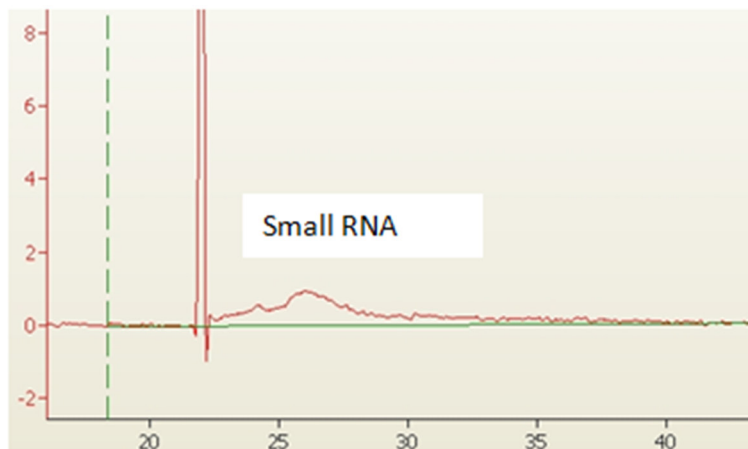

**Supplementary Figure 1:** (A) Image of the size of exosomes using the Nanosight LM10 instrument. The most frequently found size is 57 nm. (B) Western blot analysis of the exosomal membrane marker CD63. (C) The quality of RNA samples and small RNA fraction by the Agilent 2100 Bioanalyzer.
